# Supplementary figures and images for: Her2-Targeted Therapy Induces Autophagy in Esophageal Adenocarcinoma Cells
Source: MDPI journal article supplement (doi:10.3390/ijms19103069), 2018-10-08

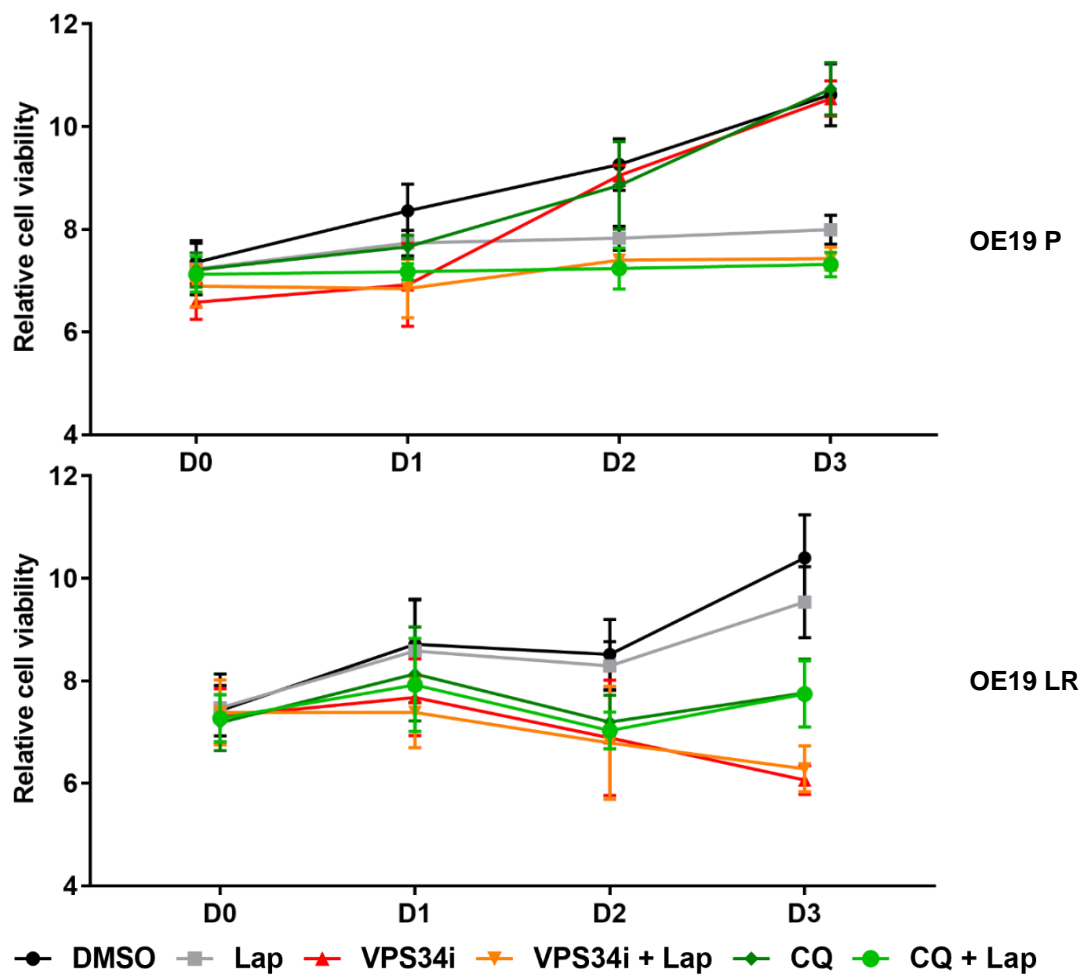

**Figure S2.** Complete data (D0-D3) of the alamarBlue<sup>®</sup> assays shown in Figure 3 (a).

Supplement: s1 [file s1]

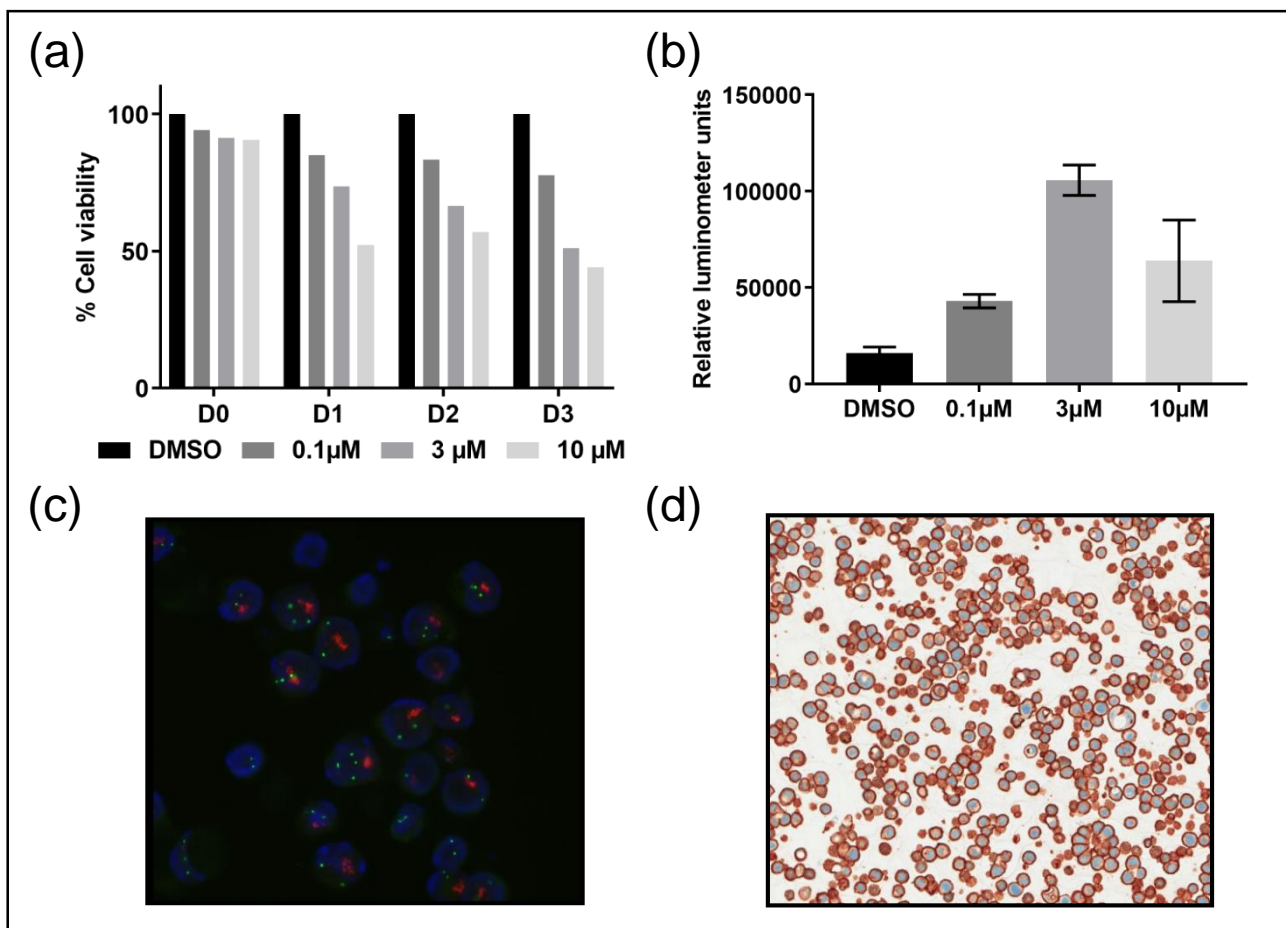

**Figure S1.** Validation of Lapatinib sensitivity and Her2 status of OE19 cells.

Supplement: s1 [file s1]

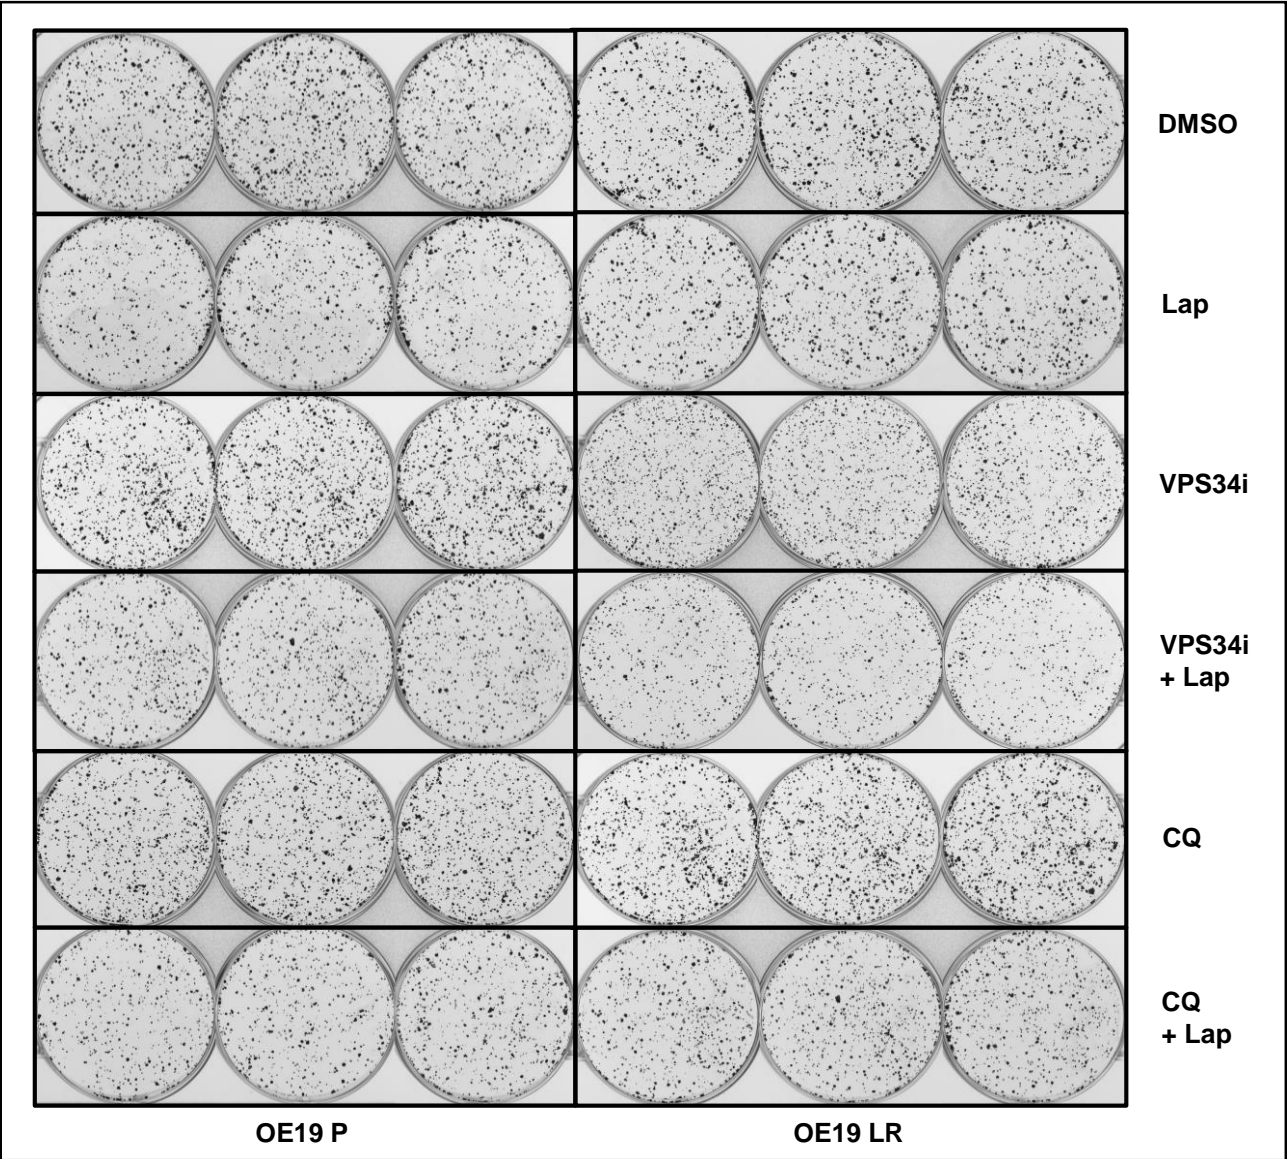

**Figure S3.** Representative pictures of the colony formation assays shown in Figure 3 (c).

Supplement: s1 [file s1]
